# Supplementary material for: Classification of Comprehensive Neuro-Ophthalmologic Measures of Postacute Concussion
Source: PubMed Central journal article supplement (PMC7930925; doi:10.1001/jamanetworkopen.2021.0599), 2021-03-03
Supplement: jamanetwopen-e210599-s001.pdf [file jamanetwopen-e210599-s001.pdf]

## Supplemental Online Content

Feller CN, Goldenberg M, Asselin PD, et al. Classification of comprehensive neuro-ophthalmologic measures of postacute concussion. *JAMA Netw Open*. 2021;4(3):e210599. doi:10.1001/jamanetworkopen.2021.0599

**eAppendix.** Description of Eye-Tracking Tests of Saccades and Description of Cognitive Testing

**eTable 1.** Comparison of All Eye-Tracking Metrics in Participants With and Without Concussion

**eTable 2.** Description of Eye-Tracking Tests of Reaction Time and Dynamic Visual Acuity

**eTable 3.** Correlation Between Clinically Important Eye-Tracking Metrics and Injury–Eye Tracking Time Interval

**eTable 4.** Classification Accuracy of Potentially Important Eye Tracking

This supplemental material has been provided by the authors to give readers additional information about their work.

## **eAppendix. Description of Eye-Tracking Tests of Saccades and Description of Cognitive Testing**

### **Description of eye tracking tests of saccades**

In the horizontal saccade test, subjects were required to focus on a target in the center of the screen before moving their eyes back and forth for 10 seconds between two peripherally appearing, 1 cm diameter white dots on a black background, 10 cm apart. Their goal was to ‘target each dot’ on the left and right of the screen as quickly and accurately as possible. The same procedure was performed in a vertical plan for the vertical saccade test.

### **Description of Cognitive testing**

This test is performed with the subject responding to visual cues on a computer screen by clicking a mouse or specific keyboard keys. Eye movements are not measured. Unlike eye-tracking, cognitive testing measures reaction time by combining results from 3 separate subtests. X’s & O’s (choice reaction time), Symbol Match (choice reaction time with a memory and learning task), and Color Match (choice and discriminate reaction time).

**eTable 1. Comparison of All Eye-Tracking Metrics in Participants With and Without Concussion**

| Metric <sup>a</sup>              | Missing data <sup>b</sup> | t                   | t-test for Equality of Means |                      |                 |                       |                          |        |           |
|----------------------------------|---------------------------|---------------------|------------------------------|----------------------|-----------------|-----------------------|--------------------------|--------|-----------|
|                                  |                           |                     | df                           | p-value <sup>c</sup> | Mean Difference | Std. Error Difference | 95% CI of the Difference |        | Cohen's d |
|                                  |                           |                     |                              |                      |                 |                       | Lower                    | Upper  |           |
| <b>SMOOTH PURSUITS</b>           |                           |                     |                              |                      |                 |                       |                          |        |           |
| Circular                         |                           |                     |                              |                      |                 |                       |                          |        |           |
| Smooth Pursuit (%)               | 0/0                       | 1.924 <sup>f</sup>  | 41.784                       | 0.101 <sup>g</sup>   | 4.747           | 2.467                 | -0.232                   | 9.726  | 0.50      |
| Saccade(s) (%)                   | 0/0                       | -1.880 <sup>f</sup> | 42.225                       | 0.092 <sup>g</sup>   | -4.495          | 2.391                 | -9.320                   | 0.330  | 0.48      |
| Eye/Target Velocity Error (°/s)  | 0/0                       | -0.453              | 84                           | 0.652                | -0.199          | 0.441                 | -1.077                   | 0.678  | 0.10      |
| Horizontal synchronization (0-1) | 0/0                       | 1.459               | 84                           | 0.148                | 0.013           | 0.009                 | -0.005                   | 0.031  | 0.33      |
| Vertical Synchronization (0-1)   | 0/0                       | 0.954               | 84                           | 0.343                | 0.013           | 0.013                 | -0.014                   | 0.038  | 0.21      |
| Predictive Smooth Pursuit (%)    | 0/0                       | 0.667               | 84                           | 0.921 <sup>g</sup>   | 1.261           | 1.891                 | -2.499                   | 5.020  | 0.15      |
| Smooth Pursuit On Target (%)     | 0/0                       | 1.430               | 84                           | 0.156                | 6.043           | 4.227                 | -2.362                   | 14.448 | 0.32      |
| Latent Smooth Pursuit (%)        | 0/0                       | -0.857              | 84                           | 0.394                | -2.530          | 2.950                 | -8.397                   | 3.337  | 0.19      |
| Horizontal                       |                           |                     |                              |                      |                 |                       |                          |        |           |
| Eye/Target Velocity Error (°/s)  | 0/0                       | 1.572               | 84                           | 0.120                | 1.203           | 0.766                 | -0.319                   | 2.726  | 0.35      |
| Horizontal synchronization (0-1) | 0/0                       | -1.382              | 84                           | 0.181 <sup>g</sup>   | -0.006          | 0.005                 | -0.015                   | 0.003  | 0.31      |
| Smooth Pursuit (%)               | 0/0                       | -0.173              | 84                           | 0.975 <sup>g</sup>   | -0.423          | 2.442                 | -5.279                   | 4.434  | 0.04      |
| Saccade(s) (%)                   | 0/0                       | -1.338 <sup>f</sup> | 43.835                       | 0.348 <sup>g</sup>   | -1.573          | 1.175                 | -3.942                   | 0.796  | 0.34      |
| Vertical                         |                           |                     |                              |                      |                 |                       |                          |        |           |
| Eye/Target Velocity Error (°/s)  | 0/0                       | -0.473              | 83                           | 0.638                | -0.362          | 0.765                 | -1.884                   | 1.160  | 0.11      |
| Horizontal synchronization (0-1) | 0/0                       | 0.050               | 83                           | 0.960                | 0.001           | 0.014                 | -0.027                   | 0.028  | 0.01      |
| Smooth Pursuit (%)               | 0/0                       | -1.566 <sup>f</sup> | 49.546                       | 0.124                | -2.820          | 1.801                 | -6.437                   | 0.798  | 0.06      |
| <b>SACCADES</b>                  |                           |                     |                              |                      |                 |                       |                          |        |           |
| Horizontal                       |                           |                     |                              |                      |                 |                       |                          |        |           |
| Saccade(s) (#), R                | 0/0                       | 1.742               | 84                           | 0.085                | 2.865           | 1.645                 | -0.406                   | 6.136  | 0.39      |
| Saccade(s) (#), L                | 0/0                       | 1.781               | 84                           | 0.079                | 2.927           | 1.644                 | -0.342                   | 6.196  | 0.40      |
| Fixations (#), R                 | 0/0                       | 1.742               | 84                           | 0.085                | 2.865           | 1.645                 | -0.406                   | 6.136  | 0.39      |
| Fixations (#), L                 | 0/0                       | 1.781               | 84                           | 0.079                | 2.927           | 1.644                 | -0.342                   | 6.196  | 0.40      |
| Target Misses (#), R             | 0/0                       | 1.770               | 84                           | 0.080                | 3.089           | 1.746                 | -0.382                   | 6.561  | 0.39      |

|                                         |      |                     |        |                    |          |        |          |          |      |
|-----------------------------------------|------|---------------------|--------|--------------------|----------|--------|----------|----------|------|
| Target Misses (#), L                    | 0/0  | 1.946               | 84     | 0.006 <sup>g</sup> | 3.058    | 1.572  | -0.068   | 6.183    | 0.43 |
| <b>Vertical</b>                         |      |                     |        |                    |          |        |          |          |      |
| Saccade(s) (#), R <sup>e</sup>          | 0/0  | 2.700               | 84     | 0.008              | 3.579    | 1.326  | 0.942    | 6.215    | 0.60 |
| Saccade(s) (#), L <sup>e</sup>          | 0/0  | 2.709               | 84     | 0.008              | 3.597    | 1.328  | 0.956    | 6.238    | 0.60 |
| Fixations (#), R <sup>e</sup>           | 0/0  | 2.700               | 84     | 0.008              | 3.579    | 1.326  | 0.942    | 6.215    | 0.60 |
| Fixations (#), L <sup>e</sup>           | 0/0  | 2.709               | 84     | 0.008              | 3.597    | 1.328  | 0.956    | 6.238    | 0.60 |
| Target Misses (#), R <sup>e</sup>       | 0/0  | 2.900               | 84     | 0.005              | 3.773    | 1.301  | 1.186    | 6.360    | 0.65 |
| Target Misses (#), L <sup>e</sup>       | 0/0  | 2.796               | 84     | 0.006              | 3.469    | 1.241  | 1.002    | 5.936    | 0.62 |
| <b>DYNAMIC VISUAL ACUITY</b>            |      |                     |        |                    |          |        |          |          |      |
| <b>Head moving, object still</b>        |      |                     |        |                    |          |        |          |          |      |
| Acuity (20/x)                           | 0/0  | 0.196               | 82     | 0.845              | 1.576    | 8.049  | -14.436  | 17.589   | 0.04 |
| <b>Head still, object moving</b>        |      |                     |        |                    |          |        |          |          |      |
| Speed (mph) <sup>d</sup>                | 1/0  | -5.381 <sup>f</sup> | 31.441 | <0.001             | -34.815  | 6.470  | -48.003  | -21.626  | 1.57 |
| Reaction time (ms) <sup>d</sup>         | 2/0  | -3.915              | 82     | <0.001             | -86.767  | 22.160 | -130.850 | -42.683  | 0.89 |
| <b>Head and object moving</b>           |      |                     |        |                    |          |        |          |          |      |
| Speed (mph) <sup>d</sup>                | 1/0  | -5.486 <sup>f</sup> | 31.442 | <0.001             | -34.511  | 6.291  | -47.334  | -21.687  | 1.60 |
| Reaction time (ms) <sup>d</sup>         | 4/0  | -3.482              | 80     | 0.001              | -81.672  | 23.458 | -128.354 | -34.990  | 0.81 |
| <b>REACTION TIME</b>                    |      |                     |        |                    |          |        |          |          |      |
| <b>Simple</b>                           |      |                     |        |                    |          |        |          |          |      |
| Reaction Time (ms) <sup>d</sup>         | 8/0  | -4.518 <sup>f</sup> | 29.928 | <0.001             | -92.500  | 20.475 | -134.320 | -50.680  | 1.35 |
| <b>Choice</b>                           |      |                     |        |                    |          |        |          |          |      |
| Visual Reaction Speed (ms) <sup>d</sup> | 13/0 | -4.034 <sup>f</sup> | 21.416 | 0.001              | -142.248 | 35.264 | -215.495 | -68.999  | 1.44 |
| Processing Speed (ms)                   | 13/0 | -1.027              | 71     | 0.308              | -23.227  | 22.616 | -68.322  | 21.868   | 0.27 |
| Reaction Time (ms) <sup>e</sup>         | 13/0 | -2.421              | 71     | 0.007 <sup>g</sup> | -82.201  | 33.951 | -149.898 | -14.504  | 0.65 |
| Response accuracy (%)                   | 8/0  | -1.116              | 76     | 0.268              | -3.338   | 2.992  | -9.297   | 2.621    | 0.27 |
| <b>Discriminate</b>                     |      |                     |        |                    |          |        |          |          |      |
| Visual Reaction Speed (ms) <sup>d</sup> | 13/0 | -4.566 <sup>f</sup> | 20.478 | <0.001             | -185.018 | 40.523 | -269.421 | -100.614 | 1.72 |
| Processing Speed (ms) <sup>e</sup>      | 13/0 | -2.096              | 71     | 0.040              | -46.849  | 22.348 | -91.409  | -2.288   | 0.56 |
| Reaction Time (ms) <sup>d</sup>         | 13/0 | -4.034 <sup>f</sup> | 24.342 | 0.001              | -126.614 | 31.387 | -191.346 | -61.882  | 1.28 |
| Response accuracy (%)                   | 8/0  | -1.479              | 76     | 0.143              | -2.162   | 1.462  | -5.074   | 0.750    | 0.36 |

<sup>a</sup>All metrics are binocular unless otherwise indicated. <sup>b</sup>N: number of concussed subjects / number of non-concussed controls with missing data. <sup>c</sup>42 total comparisons means the Bonferonni corrected p value is < 0.0012. <sup>d</sup>Clinically important metrics (see text for definition). <sup>e</sup>Metrics that did not qualify as clinically important but had moderate-high effect sizes. <sup>f</sup>Levene's test indicates unequal group variances ( $p < 0.05$ ), such that Welch-Satterthwaite adjustments to df were required. <sup>g</sup>Distribution was skewed ( $>|2.0|$ ), such that a Mann-Whitney U test was in place of an independent measures *t*-test. Mean difference data provided for consistency of presentation. ms: milliseconds. mph: miles per hour.

**eTable 2. Description of Eye-Tracking Tests of Reaction Time and Dynamic Visual Acuity**

| Test                                                      | Description                                                                                                                                                                                                                                                                                                                                                                                                                                                                                                                                                                                       | Output Metrics                                                                                                                                                                                                                                                                                                                                                                                                                               |
|-----------------------------------------------------------|---------------------------------------------------------------------------------------------------------------------------------------------------------------------------------------------------------------------------------------------------------------------------------------------------------------------------------------------------------------------------------------------------------------------------------------------------------------------------------------------------------------------------------------------------------------------------------------------------|----------------------------------------------------------------------------------------------------------------------------------------------------------------------------------------------------------------------------------------------------------------------------------------------------------------------------------------------------------------------------------------------------------------------------------------------|
| <b>Simple Reaction Time</b>                               | Subject looks at a 3 cm target in the shape of the solar system in the center of the screen. When eyes are confirmed to be looking at the target, it changes shape randomly. Subject must press number 1 on keyboard when the target changes to an alien symbol. Results are an average across 8 trials. Two practice trials were given before the eight test trials.                                                                                                                                                                                                                             | <b>Reaction Time</b> (time in milliseconds from appearance of alien symbol to keypress)                                                                                                                                                                                                                                                                                                                                                      |
| <b>Discriminate Reaction Time</b>                         | Subject looks at a 3 cm target in the shape of the solar system in the center of the screen. When eyes are confirmed to be looking at the target, an arrow moved out from the center in one of four directions (up, down, left, or right) for 8 cm. At the end of the arrow, a stimulus was presented. There were three stimulus choices. Only one stimulus required a response from the participant, which was to press the number 1 button on the keyboard. Results are an average across 8 trials. Four practice trials were given before the 8 test trials.                                   | <b>Saccadic Latency</b> (elapsed time in milliseconds from appearance of a peripheral stimulus to eyes moving off the central target) <b>Visual Reaction Speed</b> (time in milliseconds from eyes moving off the central target to hitting the peripheral stimulus) <b>Processing Speed</b> (time in milliseconds from eyes hitting the peripheral stimulus to keypress) <b>Reaction Time</b> (sum total time in milliseconds of SL+VRS+PS) |
| <b>Choice Reaction Time</b>                               | Subject looks at a 3 cm target in the shape of the solar system in the center of the screen. When eyes are confirmed to be looking at the target, an arrow moved out from the center in one of four directions (up, down, left, or right) for 8 cm. A stimulus was presented at the end of the arrow once the final location was reached. There were three stimulus choices, each requiring a different response. There was one response per stimulus (e.g., number 1 button, number 2 button). Results are an average across 8 trials. Four practice trials were given before the 8 test trials. | Same as above                                                                                                                                                                                                                                                                                                                                                                                                                                |
| <b>Dynamic Visual Acuity 1:</b> Head moving, object still | Using a 200 metronome sound at a rate of 2-hertz, subjects rotate their head left and right while keeping their eyes focused on a black box in the center of the screen. At random 0-2 sec intervals, a Landolt-C of constant 20-100 size but varying orientation (up, down, left, right) appears in the center of the screen. The participant is given up to 2 seconds to press the keyboard arrow key that corresponds to the Landolt-C orientation.                                                                                                                                            | <b>Acuity</b> (20/x)                                                                                                                                                                                                                                                                                                                                                                                                                         |
| <b>Dynamic Visual Acuity 2:</b> Head still, object moving | The subjects head is fixed. At random starting intervals, a Landolt-C moves across the screen from left to right at speeds ranging from 3 to 63 mph. The size of the Landolt-C is a constant 20-100 size but the orientation varies: up, down, left, right. The participant                                                                                                                                                                                                                                                                                                                       | <b>Speed of the stimulus</b> (mph) <b>Reaction Time</b> (time in milliseconds to keypress)                                                                                                                                                                                                                                                                                                                                                   |

|                                                        |                                                                                                         |                                                                                               |
|--------------------------------------------------------|---------------------------------------------------------------------------------------------------------|-----------------------------------------------------------------------------------------------|
|                                                        | is given up to 2 seconds to press the keyboard arrow key that corresponds to the Landolt-C orientation. |                                                                                               |
| <b>Dynamic Visual Acuity 3:</b> Head and object moving | As above, but the subjects head is allowed to move freely.                                              | <b>Speed of the stimulus</b> (mph)<br><b>Reaction Time</b> (time in milliseconds to keypress) |

**eTable 3.** Correlation Between Clinically Important Eye-Tracking Metrics and Injury–Eye Tracking Time Interval

| Eye Tracking Metric                                    | N  | Injury-eye Tracking Time Interval |         |
|--------------------------------------------------------|----|-----------------------------------|---------|
|                                                        |    | <i>r</i> -value <sup>a</sup>      | p-value |
| Simple Reaction Time: Reaction Time (ms)               | 21 | -0.140                            | 0.5492  |
| Discriminate Reaction Time: Reaction Time (ms)         | 19 | -0.054                            | 0.8303  |
| Discriminate Reaction Time: Visual Reaction Speed (ms) | 19 | -0.161                            | 0.5148  |
| Choice Reaction Time: Visual Reaction Speed (ms)       | 19 | -0.275                            | 0.2594  |
| Dynamic Visual Acuity 3: Reaction Time (ms)            | 26 | -0.217                            | 0.2900  |
| Dynamic Visual Acuity 2: Reaction Time (ms)            | 27 | -0.303                            | 0.1252  |

N: number of subjects. ms: milliseconds. <sup>a</sup>Spearman's correlation coefficient



| <b>eTable 4. Classification Accuracy of Potentially Important Eye Tracking</b> |                |              |                 |
|--------------------------------------------------------------------------------|----------------|--------------|-----------------|
| <b>Metric</b>                                                                  | <b>p-value</b> | <b>AUROC</b> | <b>Cohens D</b> |
| Dynamic Visual Acuity 3: Speed (mph)                                           | <0.0001        | 0.70         | 1.60            |
| Dynamic Visual Acuity 2: Speed (mph)                                           | <0.0001        | 0.68         | 1.57            |
| Vertical Saccades, Target Misses (#), R                                        | 0.0026         | NC           | 0.65            |
| Choice Reaction Time: Reaction Time (ms)                                       | 0.0047         | NC           | 0.65            |
| Vertical Saccades, Target Misses (#), L                                        | 0.0041         | NC           | 0.62            |
| Vertical Saccades, Saccades (#), R                                             | 0.0084         | NC           | 0.60            |
| Vertical Saccades, Saccades (#), L                                             | 0.0078         | NC           | 0.60            |
| Vertical Saccades, Fixations (#), R                                            | 0.0081         | NC           | 0.60            |
| Vertical Saccades, Fixations (#), L                                            | 0.0078         | NC           | 0.60            |
| Discriminate Reaction Time: Processing Speed (ms)                              | 0.040          | NC           | 0.56            |

NC: not calculated because p-value  $\geq 0.0012$ . mph: miles per hour. ms: milliseconds.
